# Supplementary material for: Early prediction of renal graft function: Analysis of a multi-centre, multi-level data set
Source: bioRxiv or medRxiv preprint supplement (doi:10.1101/2021.01.04.20248473), 2021-01-05

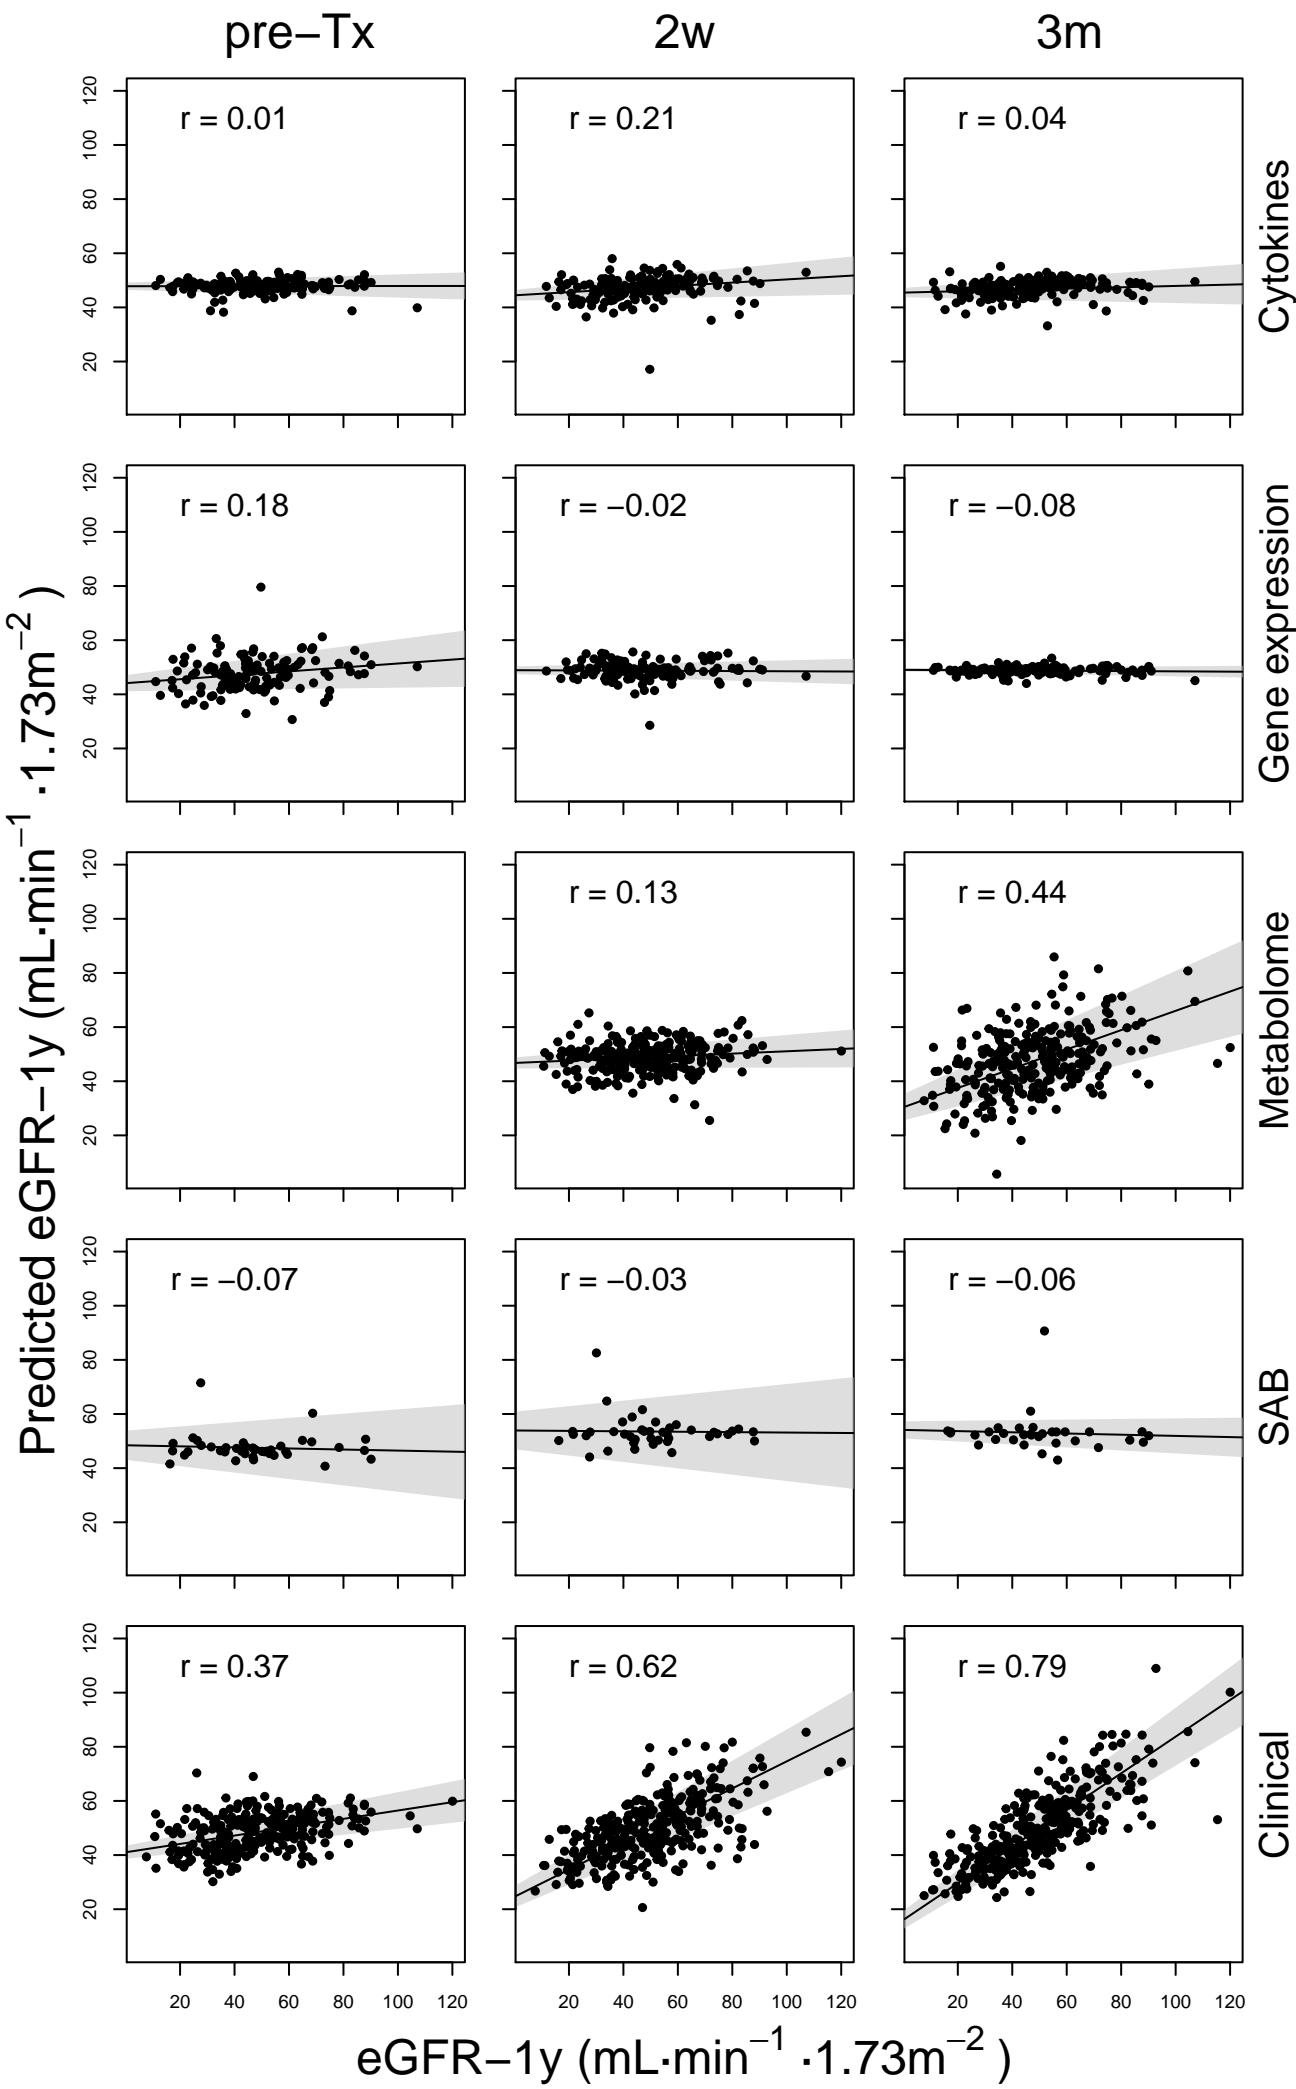

Supplement: Supplementary file [file media-2.pdf]
